# Supplementary material
Source: Springer Nature journal article supplement (https://www.springermedizin.de/resource/supplementary/12874_2011_740_MOESM4_ESM.pdf/9432830)

(a) 0.25 years, 5 trials

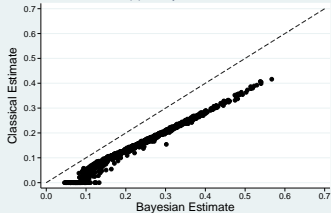

(b) 0.25 years, 10 trials

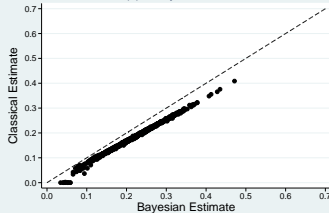

(c) 0.25 years, 30 trials

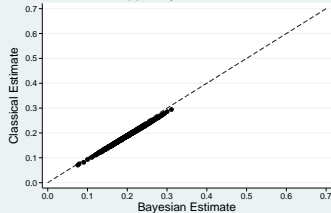

(d) 0.5 years, 5 trials

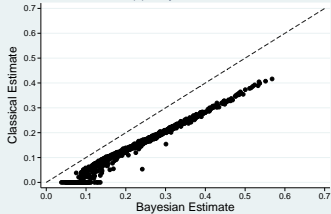

(e) 0.5 years, 10 trials

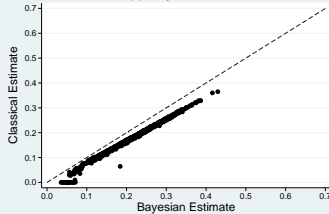

(f) 0.5 years, 30 trials

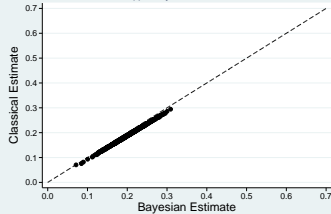

(g) 1 year, 5 trials

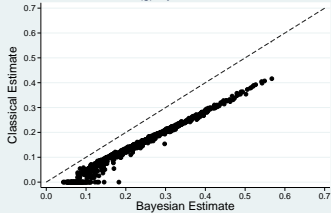

(h) 1 year, 10 trials

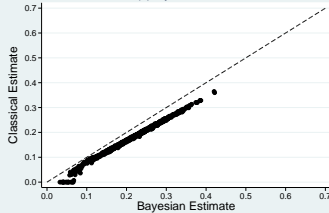

(i) 1 year, 30 trials

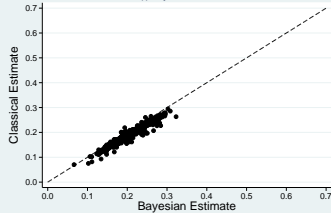

Supplement: MOESM4 [file 9432830]
